# Supplementary material for: Pt decorated hierarchical Sb2WO6 microspheres as a surface functionalized photocatalyst for the visible-light-driven reduction of nitrobenzene to aniline
Source: Royal Society of Chemistry journal article supplement (doi:10.1039/d0ta06099b), 2020-01-01
Supplement: d0ta06099b1.pdf [file d0ta06099b1.pdf]

## Supplementary information

### **Pt decorated hierarchical Sb<sub>2</sub>WO<sub>6</sub> microsphere as a surface functionalized photocatalyst for the visible-light-driven reduction of nitrobenzene to aniline**

Yingzhang Shi,<sup>a</sup> Huan Wang,<sup>a</sup> Zhiwen Wang,<sup>a</sup> Tai kang Wu,<sup>a</sup> Yujie Song,<sup>a</sup> Binbin Guo,<sup>a,b</sup> Ling Wu<sup>a,b\*</sup>

<sup>a</sup> State Key Laboratory of Photocatalysis on Energy and Environment, Fuzhou University, Fuzhou, Fujian 350116, P. R. China.

<sup>b</sup> State Key Laboratory of Structural Chemistry, Fujian Institute of Research on the Structure of Matter, Chinese Academy of Science, Fuzhou, Fujian 350002, P. R. China.

Corresponding author: Ling Wu

E-mail: [wuling@fzu.edu.cn](mailto:wuling@fzu.edu.cn)

Tel: +86-591-22865835

**Table S1** XPS fitting results for the prepared SWO-NS and Pt/SWO-NS.

| Samples   | Peak                                     | Assignment       | BE (eV)      | Fraction (%) |
|-----------|------------------------------------------|------------------|--------------|--------------|
| SWO-NS    | W 4f <sub>5/2</sub> / 4f <sub>7/2</sub>  | W <sup>6+</sup>  | 37.70/ 35.50 | 57.61        |
|           |                                          | W <sup>5+</sup>  | 36.40/ 34.40 | 42.39        |
| Pt/SWO-NS |                                          | W <sup>6+</sup>  | 37.70/ 35.50 | 63.51        |
|           |                                          | W <sup>5+</sup>  | 36.60/ 34.60 | 36.49        |
| Pt/SWO-NS | Pt 4f <sub>5/2</sub> / 4f <sub>7/2</sub> | Pt <sup>0</sup>  | 71.10/74.45  | 5.46         |
|           |                                          | Pt <sup>2+</sup> | 72.20/75.55  | 94.54        |

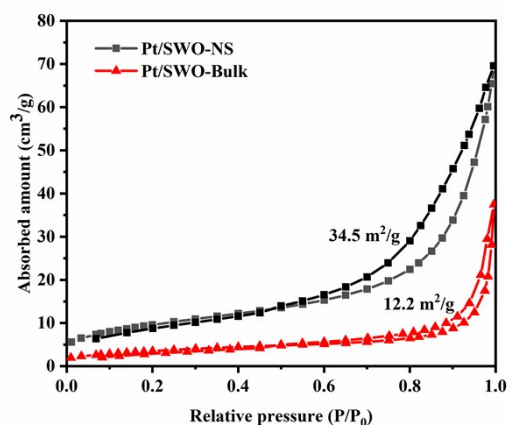

**Fig. S1** Nitrogen (N<sub>2</sub>) adsorption-desorption isotherms of SWO-NS and SWO-Bulk.

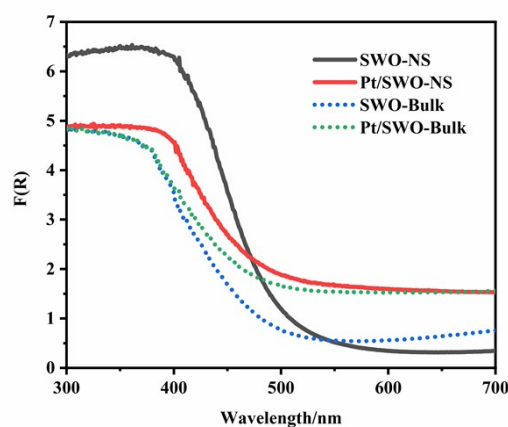

**Fig. S2** UV-vis DRS of SWO-NS, Pt/SWO-NS, SWO-Bulk, Pt/SWO-Bulk.

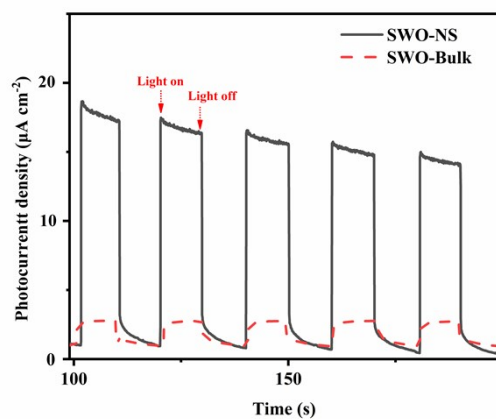

**Fig. S3** Photocurrent responses of SWO-NS and SWO-Bulk under visible light irradiation.

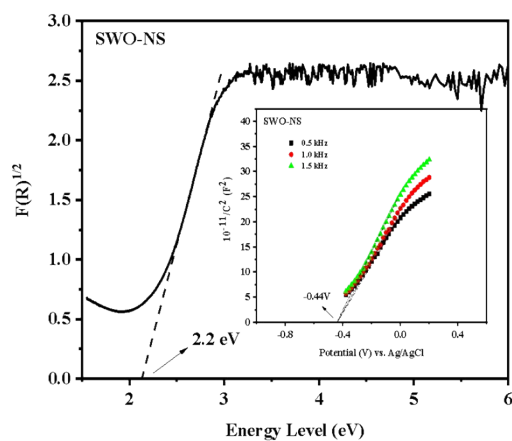

**Fig. S4**  $(F(R))^{0.5}$  as a function of photon energy ( $h\nu$ ), where  $F$  is the Kubelka-Munk function. and the inset is the Mott-Schottky plots of SWO-NS.

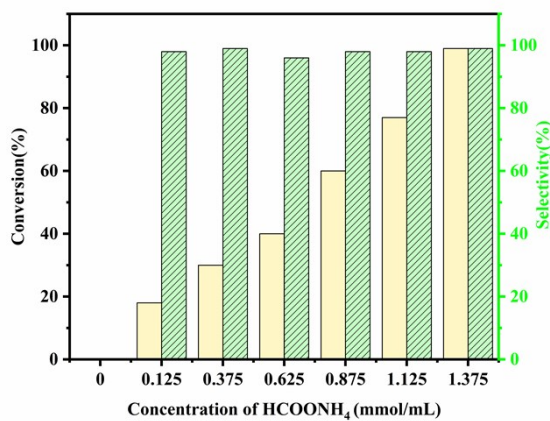

**Fig. S5** Conversion of nitrobenzene and selectivity of aniline with different concentration of

HCOONH<sub>4</sub>. Reaction condition: Catalyst 10 mg, HCOONH<sub>4</sub>/methanol solution 1.5 mL, nitrobenzene 0.1 mmol, Ar, 1 atm,  $\lambda \geq 420$ , time 2 h, room temperature.

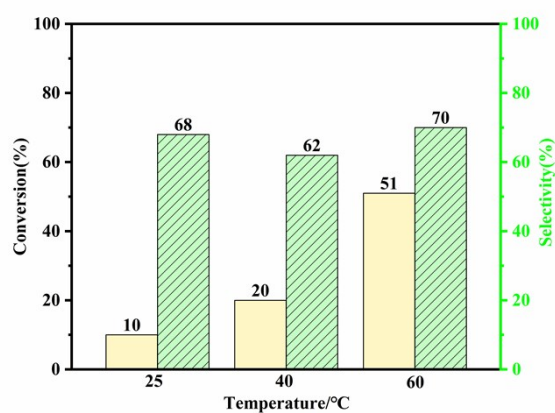

**Fig. S6** Conversion of nitrobenzene and selectivity of aniline with different reaction temperature in the dark. Reaction condition: Catalyst 10 mg, 1.375 mmol/mL HCOONH<sub>4</sub>/methanol solution 1.5 mL, nitrobenzene 0.1 mmol, Ar, 1 atm, time 2 h, room temperature.

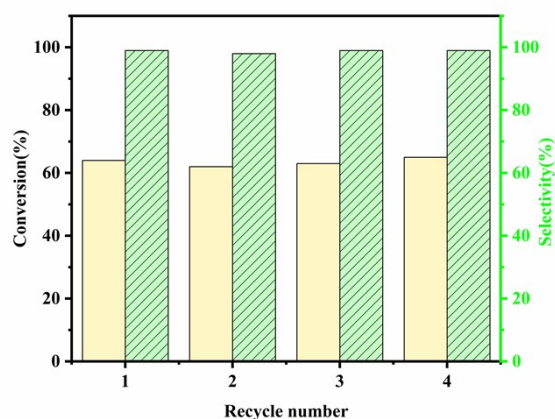

**Fig. S7** Recycle experiment in constant temperature. Reaction condition: Catalyst 10 mg, 1.375 mmol/mL HCOONH<sub>4</sub>/methanol solution 1.5 mL, nitrobenzene 0.1 mmol, Ar, 1 atm,  $\lambda \geq 420$ , time 2 h, 298K. Reaction temperature was controlled via a jacket connected to a circulating water source to avoid the thermal effect under the light irradiation.

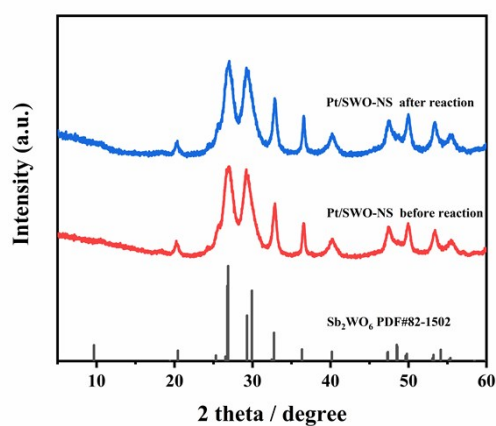

**Fig. S8** XRD patterns of the Pt/SWO-NS sample (before and after reaction).

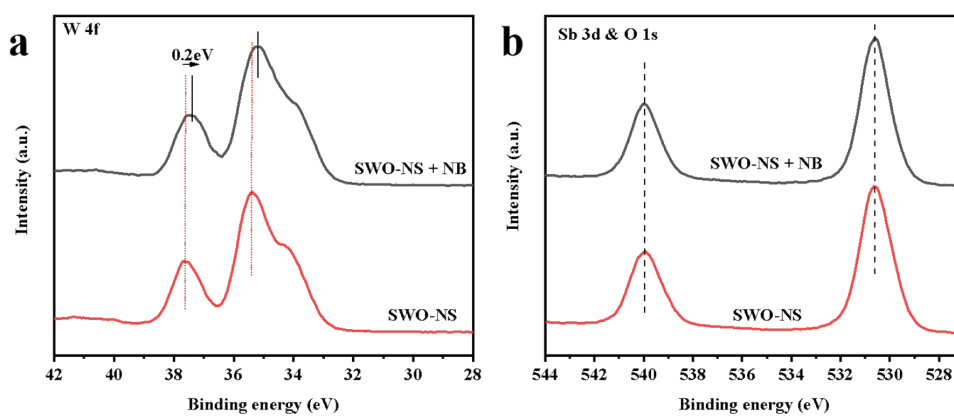

**Fig. S9** XPS spectrum of SWO-NS and SWO-NS + NB. (a) W 4f; (b) Sb 3d & O 1s.

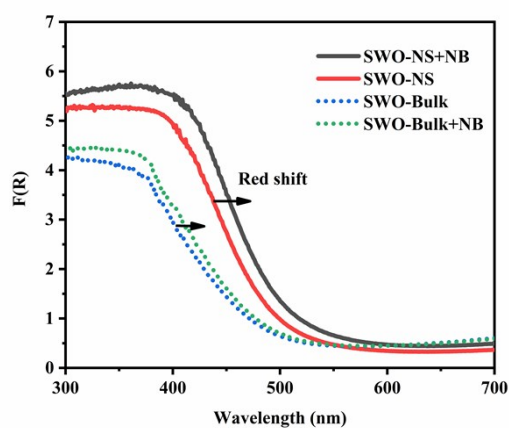

**Fig. S10** UV-vis diffuse reflectance spectra of SWO-NS, SWO-Bulk, SWO-NS/NB and SWO-Bulk/NB.

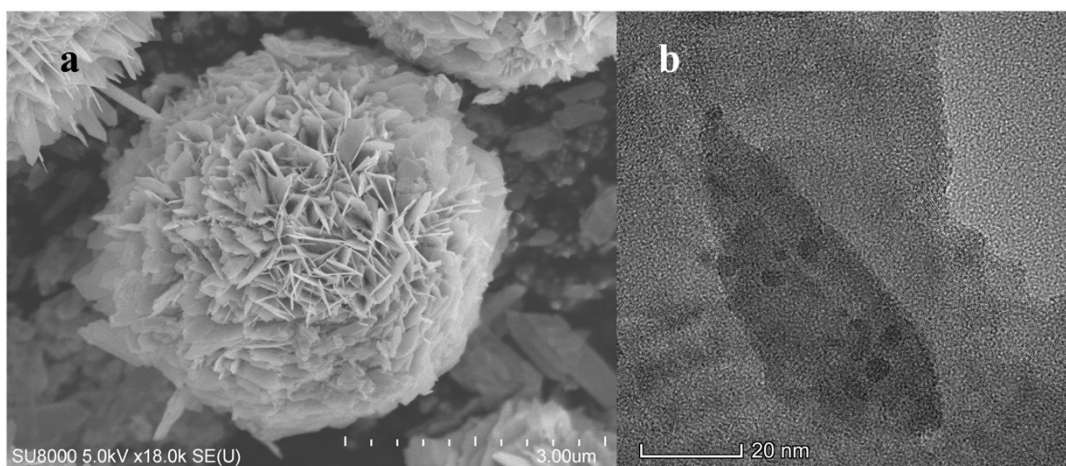

**Fig. S11** SEM (a) and TEM (b) images of Pt/SWO-NS after the catalysis.

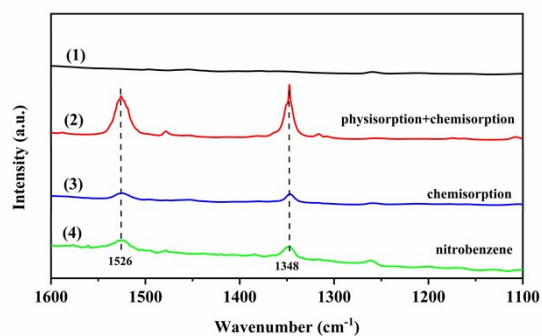

**Fig. S12** In-situ FTIR spectra of Pt/SWO-NS adsorbed NB molecules. 1) After degassing in vacuum at 180 °C for 3 h; 2) adsorption of nitrobenzene for 0.5 h at room temperature (physorption +chemisorption); 3) further degassing in vacuum at 180 °C for 5 min (chemisorption); 4) adsorption of nitrobenzene on KBr.
